# Supplementary material
Source: MDPI journal article supplement (https://www.mdpi.com/1996-1073/15/22/8351)
Supplement: s1 [file s1 › energies-1966085-supplementary.pdf]

**Table S1.** Familiarity with the delivery method—factors differentiating the answers provided by rural e-customers (own elaboration).

| Courier Delivery Directly to Home/Work |                              |                                     |      |                     |      |                     |                |
|----------------------------------------|------------------------------|-------------------------------------|------|---------------------|------|---------------------|----------------|
| Qualitative variables                  |                              |                                     |      |                     |      |                     |                |
| Variable                               | Class                        | Number of respondents familiar with |      | Percent             |      | <i>p</i> value      |                |
| Age                                    | 18–24                        | 80 out of 98                        |      | 81.6                |      | 0.0004              |                |
|                                        | >=25                         | 906 out of 973                      |      | 93.1                |      |                     |                |
| Education                              | None or upper primary school | 13 out of 19                        |      | 68.4                |      | 0.0025              |                |
|                                        | Other                        | 973 out of 1052                     |      | 92.5                |      |                     |                |
|                                        |                              |                                     |      |                     |      |                     |                |
| Quantitative variables                 |                              |                                     |      |                     |      |                     |                |
| Variable                               | Knows about                  |                                     |      | Does not know about |      |                     | <i>p</i> value |
|                                        | n                            | Mean                                | SD   | n                   | Mean | SD                  |                |
| Age                                    | 986                          | 46.8                                | 15.8 | 85                  | 38.7 | 15.6                | 0.0000         |
| Logistic regression models             |                              |                                     |      |                     |      |                     |                |
| Variable                               | Class                        | Single-variable model               |      |                     |      | Multiple regression |                |
|                                        |                              | Odds ratio                          |      | <i>p</i> value      |      | Odds ratio          | <i>p</i> value |
| Age                                    | 18–24                        | 1.000                               |      | -                   |      | -                   | -              |
|                                        | >=25                         | 3.043                               |      | 0.0001              |      | -                   | -              |
| Age                                    |                              | 1.035                               |      | 0.0000              |      | 1.032               | 0.0001         |
| Education                              | None or upper primary school | 1.000                               |      | -                   |      | 1.000               | -              |
|                                        | continuous variable          | 5.685                               |      | 0.0006              |      | 3.918               | 0.0086         |
|                                        | Other                        |                                     |      |                     |      |                     |                |
| By post office directly to home/work   |                              |                                     |      |                     |      |                     |                |
| Qualitative variables                  |                              |                                     |      |                     |      |                     |                |
| Variable                               | Class                        | Number of respondents familiar with |      | Percent             |      | <i>p</i> value      |                |
| Age                                    | 18–24                        | 58 out of 98                        |      | 59.2                |      | 0.0094              |                |
|                                        | >=25                         | 701 out of 973                      |      | 72.1                |      |                     |                |
| Gender                                 | Female                       | 398 out of 543                      |      | 73.3                |      | 0.0761              |                |
|                                        | Male                         | 361 out of 528                      |      | 68.4                |      |                     |                |
| Quantitative variables                 |                              |                                     |      |                     |      |                     |                |
| Variable                               | Knows about                  |                                     |      | Does not know about |      |                     | <i>p</i> value |
|                                        | n                            | Mean                                | SD   | n                   | Mean | SD                  |                |
| Number of persons in a household       | 759                          | 3.30                                | 1.44 | 312                 | 3.11 | 1.43                | 0.0404         |
| Logistic regression models             |                              |                                     |      |                     |      |                     |                |
| Variable                               | Class                        | Single-variable model               |      |                     |      | Multiple regression |                |
|                                        |                              | Odds ratio                          |      | <i>p</i> value      |      | Odds ratio          | <i>p</i> value |
| Age                                    | 18–24                        | 1.000                               |      | -                   |      | -                   | -              |
|                                        | >=25                         | 1.777                               |      | 0.0083              |      | 2.025               | 0.0017         |
| Gender                                 | Female                       | 1.270                               |      | 0.0765              |      | -                   | -              |
|                                        | Male                         | 1.000                               |      | -                   |      |                     |                |

|                                          |                               |                                     |                |                     |                |                |        |
|------------------------------------------|-------------------------------|-------------------------------------|----------------|---------------------|----------------|----------------|--------|
| Number of persons in a household         | Discrete variable             | 1.102                               | 0.0412         | 1.136               | 0.0093         |                |        |
| Pickup in a parcel locker                |                               |                                     |                |                     |                |                |        |
| Qualitative variables                    |                               |                                     |                |                     |                |                |        |
| Variable                                 | Class                         | Number of respondents familiar with |                | Percent             | <i>p</i> value |                |        |
| Education                                | At least secondary            | 876 out of 1026                     |                | 84.4                | 0.0002         |                |        |
|                                          | Lower                         | 28 out of 45                        |                | 62.2                |                |                |        |
| Number of neighbors                      | 11–99                         | 563 out of 644                      |                | 87.4                | 0.0069         |                |        |
|                                          | Other                         | 285 out of 352                      |                | 81.0                |                |                |        |
| Logistic regression models               |                               |                                     |                |                     |                |                |        |
| Variable                                 | Class                         | Single-variable model               |                | Multiple regression |                |                |        |
|                                          |                               | Odds ratio                          | <i>p</i> value | Odds ratio          | <i>p</i> value |                |        |
| Education                                | At least secondary            | 3.546                               | 0.0001         | -                   | -              |                |        |
|                                          | Lower                         | 1.000                               | -              | -                   | -              |                |        |
| Number of neighbors                      | 11–99                         | 1.634                               | 0.0065         | 1.612               | 0.0084         |                |        |
|                                          | Other                         | 1.000                               | -              | 1.000               | -              |                |        |
| Pickup at the post office                |                               |                                     |                |                     |                |                |        |
| Qualitative variables                    |                               |                                     |                |                     |                |                |        |
| Variable                                 | Class                         | Number of respondents familiar with |                | Percent             | <i>p</i> value |                |        |
| Age                                      | 18–24                         | 52 out of 98                        |                | 53.1                | 0.0226         |                |        |
|                                          | >=25                          | 631 out of 973                      |                | 64.9                |                |                |        |
| Education                                | Primary                       | 10 out of 26                        |                | 38.5                | 0.0081         |                |        |
|                                          | Other                         | 673 out of 1045                     |                | 64.4                |                |                |        |
| Logistic regression models               |                               |                                     |                |                     |                |                |        |
| Variable                                 | Class                         | Single-variable model               |                | Multiple regression |                |                |        |
|                                          |                               | Odds ratio                          | <i>p</i> value | Odds ratio          | <i>p</i> value |                |        |
| Age                                      | 18–24                         | 1.000                               | -              | 1.000               | -              |                |        |
|                                          | >=25                          | 1.632                               | 0.0219         | 1.645               | 0.0201         |                |        |
| Education                                | Primary                       | 1.000                               | -              | 1.000               | -              |                |        |
|                                          | Other                         | 2.895                               | 0.0095         | 2.930               | 0.0086         |                |        |
| Pickup from the seller—click and collect |                               |                                     |                |                     |                |                |        |
| Qualitative variables                    |                               |                                     |                |                     |                |                |        |
| Variable                                 | Class                         | Number of respondents familiar with |                | Percent             | <i>p</i> value |                |        |
| Age                                      | 25–64                         | 383 out of 767                      |                | 49.9                | 0.0003         |                |        |
|                                          | Other                         | 115 out of 304                      |                | 37.8                |                |                |        |
| Education                                | At least upper primary school | 487 out of 1031                     |                | 47.2                | 0.0121         |                |        |
|                                          | Other                         | 11 out of 40                        |                | 27.5                |                |                |        |
| Quantitative variables                   |                               |                                     |                |                     |                |                |        |
| Variable                                 | Knows about                   |                                     |                | Does not know about |                | <i>p</i> value |        |
|                                          | N                             | Mean                                | SD             | n                   | Mean           |                | SD     |
| Age                                      | 498                           | 44.8                                | 15.1           | 573                 | 47.4           | 16.6           | 0.0073 |
| Number of persons in a household         | 498                           | 3.36                                | 1.39           | 573                 | 3.15           | 1.48           | 0.0164 |
| Logistic regression models               |                               |                                     |                |                     |                |                |        |
| Variable                                 | Class                         | Single-variable model               |                | Multiple regression |                |                |        |
|                                          |                               | Odds ratio                          | <i>p</i> value | Odds ratio          | <i>p</i> value |                |        |
| Age                                      | 25–64                         | 1.639                               | 0.0004         | 1.658               | 0.0003         |                |        |

|                                                        |                               |                                     |                |                     |                |                |        |
|--------------------------------------------------------|-------------------------------|-------------------------------------|----------------|---------------------|----------------|----------------|--------|
|                                                        | Other                         | 1.000                               | -              | 1.000               | -              |                |        |
| Age                                                    | Continuous variable           | 0.990                               | 0.0079         | -                   | -              |                |        |
| Education                                              | At least upper primary school | 2.360                               | 0.0168         | 2.454               | 0.0130         |                |        |
|                                                        | Other                         | 1.000                               | -              | 1.000               | -              |                |        |
| Number of persons in a household                       | Discrete variable             | 1.107                               | 0.0172         | -                   | -              |                |        |
| Pickup at a kiosk/shop or other pickup point           |                               |                                     |                |                     |                |                |        |
| Qualitative variables                                  |                               |                                     |                |                     |                |                |        |
| Variable                                               | Class                         | Number of respondents familiar with |                | Percent             | <i>p</i> value |                |        |
| Age                                                    | 25–64                         | 420 out of 767                      |                | 54.8                | 0.0000         |                |        |
|                                                        | Other                         | 124 out of 304                      |                | 40.8                |                |                |        |
| Education                                              | At least upper primary school | 532 out of 1031                     |                | 51.6                | 0.0066         |                |        |
|                                                        | Other                         | 12 out of 40                        |                | 30.0                |                |                |        |
| Quantitative variables                                 |                               |                                     |                |                     |                |                |        |
| Variable                                               | Knows about                   |                                     |                | Does not know about |                | <i>p</i> value |        |
|                                                        | n                             | Mean                                | SD             | n                   | Mean           |                | SD     |
| Age                                                    | 544                           | 45.2                                | 14.9           | 527                 | 47.2           | 16.9           | 0.0428 |
| Number of persons in a household                       | 544                           | 3.32                                | 1.38           | 527                 | 3.18           | 1.51           | 0.0838 |
| Logistic regression models                             |                               |                                     |                |                     |                |                |        |
| Variable                                               | Class                         | Single-variable model               |                | Multiple regression |                | <i>p</i> value |        |
|                                                        |                               | Odds ratio                          | <i>p</i> value | Odds ratio          | <i>p</i> value |                |        |
| Age                                                    | 25–64                         | 1.757                               | 0.0000         | 1.781               | 0.0000         | -              |        |
|                                                        | Other                         | 1.000                               | -              | 1.000               | -              |                |        |
| Age                                                    | Continuous variable           | 0.992                               | 0.0426         | -                   | -              | -              |        |
| Education                                              | At least upper primary school | 2.488                               | 0.0095         | 2.608               | 0.0066         | -              |        |
|                                                        | Other                         | 1.000                               | -              | 1.000               | -              |                |        |
| Number of persons in a household                       | Discrete variable             | 1.076                               | 0.0839         | -                   | -              | -              |        |
| Free home delivery with the possibility of free return |                               |                                     |                |                     |                |                |        |
| Qualitative variables                                  |                               |                                     |                |                     |                |                |        |
| Variable                                               | Class                         | Number of respondents familiar with |                | Percent             | <i>p</i> value |                |        |
| Education                                              | At least upper primary school | 542 out of 1031                     |                | 52.6                | 0.0046         |                |        |
|                                                        | Other                         | 12 out of 40                        |                | 30.0                |                |                |        |
| Number of neighbors                                    | 7–20                          | 194 out of 416                      |                | 46.6                | 0.0040         |                |        |
|                                                        | Other                         | 324 out of 580                      |                | 55.9                |                |                |        |
| Logistic regression models                             |                               |                                     |                |                     |                |                |        |
| Variable                                               | Class                         | Single-variable model               |                | Multiple regression |                | <i>p</i> value |        |
|                                                        |                               | Odds ratio                          | <i>p</i> value | Odds ratio          | <i>p</i> value |                |        |
| Education                                              | At least upper primary school | 2.586                               | 0.0069         | -                   | -              | -              |        |
|                                                        | Other                         | 1.000                               | -              | -                   | -              |                |        |
| Number of neighbors                                    | 7–20                          | 1.000                               | -              | 1.000               | -              | 0.0041         |        |
|                                                        | Other                         | 1.448                               | 0.0041         | 1.448               | -              |                |        |

**Table S2.** The use of particular delivery methods—factors differentiating the answers provided by rural e-customers (own elaboration).

| Pickup in a Parcel Locker                |                     |                             |                |                     |                |                |                |
|------------------------------------------|---------------------|-----------------------------|----------------|---------------------|----------------|----------------|----------------|
| Qualitative variables                    |                     |                             |                |                     |                |                |                |
| Variable                                 | Class               | Number of respondents using |                | Percent             |                | <i>p</i> value |                |
| Education                                | At least second-ary | 785 out of 876              |                | 89.6                |                | 0.0316         |                |
|                                          | Lower               | 21 out of 28                |                | 75.0                |                |                |                |
| Number of neighbors                      | Lower than 7        | 65 out of 79                |                | 82.3                |                | 0.0335         |                |
|                                          | At least 7          | 696 out of 769              |                | 90.5                |                |                |                |
| Quantitative variables                   |                     |                             |                |                     |                |                |                |
| Variable                                 | Used                |                             |                | Did not use         |                |                | <i>p</i> value |
|                                          | n                   | Mean                        | SD             | n                   | Mean           | SD             |                |
| Age                                      | 806                 | 45.9                        | 15.7           | 98                  | 48.8           | 15.7           | 0.0825         |
| Logistic regression models               |                     |                             |                |                     |                |                |                |
| Variable                                 | Class               | Single-variable model       |                | Multiple regression |                |                |                |
|                                          |                     | Odds ratio                  | <i>p</i> value | Odds ratio          | <i>p</i> value |                |                |
| Education                                | At least second-ary | 2.875                       |                | 0.0190              |                | 3.487          |                |
|                                          | Lower               | 1.000                       |                | -                   |                | 1.000          |                |
| Number of neighbors                      | Lower than 7        | 1.000                       |                | -                   |                | 1.000          |                |
|                                          | At least 7          | 2.054                       |                | 0.0242              |                | 2.048          |                |
| Age                                      | Continuous variable | 0.988                       |                | 0.0814              |                | 0.984          |                |
| 0.0325                                   |                     |                             |                |                     |                |                |                |
| Pickup at the post office                |                     |                             |                |                     |                |                |                |
| Qualitative variables                    |                     |                             |                |                     |                |                |                |
| Variable                                 | Class               | Number of respondents using |                | Percent             |                | <i>p</i> value |                |
| Gender                                   | Female              | 206 out of 350              |                | 58.9                |                | 0.0070         |                |
|                                          | Male                | 229 out of 333              |                | 68.8                |                |                |                |
| Quantitative variables                   |                     |                             |                |                     |                |                |                |
| Variable                                 | Used                |                             |                | Did not use         |                |                | <i>p</i> value |
|                                          | n                   | Mean                        | SD             | n                   | Mean           | SD             |                |
| Number of persons in a household         | 435                 | 3.35                        | 1.47           | 248                 | 3.11           | 1.29           | 0.0261         |
| Logistic regression models               |                     |                             |                |                     |                |                |                |
| Variable                                 | Class               | Single-variable model       |                | Multiple regression |                |                |                |
|                                          |                     | Odds ratio                  | <i>p</i> value | Odds ratio          | <i>p</i> value |                |                |
| Gender                                   | Female              | 1.000                       |                | -                   |                | 1.000          |                |
|                                          | Male                | 1.539                       |                | 0.0072              |                | 1.549          |                |
| Number of persons in a household         | Discrete variable   | 1.133                       |                | 0.0323              |                | 1.136          |                |
| 0.0316                                   |                     |                             |                |                     |                |                |                |
| Pickup from the seller—click and collect |                     |                             |                |                     |                |                |                |
| Qualitative variables                    |                     |                             |                |                     |                |                |                |
| Variable                                 | Class               | Number of respondents using |                | Percent             |                | <i>p</i> value |                |
| Education                                | Higher              | 135 out of 223              |                | 60.5                |                | 0.0040         |                |
|                                          | Other               | 131 out of 275              |                | 47.6                |                |                |                |
| Logistic regression models               |                     |                             |                |                     |                |                |                |

| Variable                                               | Class             | Single-variable model       |                | Multiple regression |                |                |
|--------------------------------------------------------|-------------------|-----------------------------|----------------|---------------------|----------------|----------------|
|                                                        |                   | Odds ratio                  | <i>p</i> value | Odds ratio          | <i>p</i> value |                |
| Education                                              | Higher            | 1.686                       | 0.0042         | 1.686               | 0.0042         |                |
|                                                        | Other             | 1.000                       | -              | 1.000               | -              |                |
| Pickup at a kiosk/shop or other pickup point           |                   |                             |                |                     |                |                |
| Qualitative variables                                  |                   |                             |                |                     |                |                |
| Variable                                               | Class             | Number of respondents using | Percent        | <i>p</i> value      |                |                |
| Gender                                                 | Female            | 161 out of 270              | 59.6           | 0.0362              |                |                |
|                                                        | Male              | 187 out of 274              | 68.3           |                     |                |                |
| Logistic regression models                             |                   |                             |                |                     |                |                |
| Variable                                               | Class             | Single-variable model       |                | Multiple regression |                |                |
|                                                        |                   | Odds ratio                  | <i>p</i> value | Odds ratio          | <i>p</i> value |                |
| Gender                                                 | Female            | 1.000                       | -              | 1.000               | -              |                |
|                                                        | Male              | 1.455                       | 0.0367         | 1.455               | 0.0367         |                |
| Free home delivery with the possibility of free return |                   |                             |                |                     |                |                |
| Quantitative variables                                 |                   |                             |                |                     |                |                |
| Variable                                               | n                 | Used                        |                | Did not use         |                | <i>p</i> value |
|                                                        |                   | Mean                        | SD             | n                   | Mean SD        |                |
| Number of persons in a household                       | 338               | 3.43                        | 1.58           | 216                 | 3.12 1.22      | 0.0097         |
| Logistic regression models                             |                   |                             |                |                     |                |                |
| Variable                                               | Class             | Single-variable model       |                | Multiple regression |                |                |
|                                                        |                   | Odds ratio                  | <i>p</i> value | Odds ratio          | <i>p</i> value |                |
| Number of persons in a household                       | Discrete variable | 1.163                       | 0.0150         | 1.163               | 0.0150         |                |

**Table S3.** Reasons for choosing the preferred delivery method—factors differentiating the answers provided by rural e-customers (own elaboration).

| Cheaper                                |         |                                     |                   |                     |                |
|----------------------------------------|---------|-------------------------------------|-------------------|---------------------|----------------|
| Courier delivery directly to home/work |         |                                     |                   |                     |                |
| Qualitative variables                  |         |                                     |                   |                     |                |
| Variable                               | Class   | Number of respondents familiar with |                   | Percent             | <i>p</i> value |
| Education                              | Primary | 9 out of 25                         |                   | 36.0                | 0.0005         |
|                                        | Other   | 93 out of 961                       |                   | 9.7                 |                |
| Logistic regression models             |         |                                     |                   |                     |                |
| Variable                               | Class   | Single-variable model               |                   | Multiple regression |                |
|                                        |         | Odds ratio                          | <i>p</i> value    | Odds ratio          | <i>p</i> value |
| Education                              | Primary | 5.250                               | 0.0001            | 5.250               | 0.0001         |
|                                        | Other   | 1.000                               | -                 | 1.000               | -              |
| By post office directly to home/work   |         |                                     |                   |                     |                |
| Qualitative variables                  |         |                                     |                   |                     |                |
| Variable                               | Class   | Number of respondents familiar with |                   | Percent             | <i>p</i> value |
| Age                                    | 18-34   | 45 out of 199                       |                   | 22.6                | 0.0008         |
|                                        | 35+     | 69 out of 560                       |                   | 12.3                |                |
| Quantitative variables                 |         |                                     |                   |                     |                |
| Pointed out                            |         |                                     | Did not point out |                     | <i>p</i> value |

| Variable                         | n                   | Mean                                | SD      | n                 | Mean                | SD                  |         |
|----------------------------------|---------------------|-------------------------------------|---------|-------------------|---------------------|---------------------|---------|
| Age                              | 114                 | 41.7                                | 15.2    | 645               | 47.7                | 15.7                | 0.0002  |
| Logistic regression models       |                     |                                     |         |                   |                     |                     |         |
| Variable                         | Class               | Single-variable model               |         |                   | Multiple regression |                     |         |
|                                  |                     | Odds ratio                          | P value |                   | Odds ratio          | p value             |         |
| Age                              | 18-34               | 2.079                               | 0.0006  |                   | -                   |                     | -       |
|                                  | 35+                 | 1.000                               | -       |                   | -                   |                     | -       |
| Age                              | Continuous variable | 0.975                               | 0.0002  |                   | 0.975               |                     | 0.0002  |
| Pickup in a parcel locker        |                     |                                     |         |                   |                     |                     |         |
| Qualitative variables            |                     |                                     |         |                   |                     |                     |         |
| Variable                         | Class               | Number of respondents familiar with |         | Percent           |                     | p value             |         |
| Age                              | 18-44               | 216 out of 429                      |         | 50.4              |                     | 0.0000              |         |
|                                  | 45+                 | 174 out of 475                      |         | 36.6              |                     |                     |         |
| Quantitative variables           |                     |                                     |         |                   |                     |                     |         |
| Variable                         | Pointed out         |                                     |         | Did not point out |                     |                     | p value |
|                                  | N                   | Mean                                | SD      | n                 | Mean                | SD                  |         |
| Age                              | 390                 | 43.6                                | 15.4    | 514               | 48.2                | 15.7                | 0.0000  |
| Number of persons in a household | 390                 | 3.38                                | 1.43    | 514               | 3.17                | 1.40                | 0.0277  |
| Logistic regression models       |                     |                                     |         |                   |                     |                     |         |
| Variable                         | Class               | Single-variable model               |         |                   |                     | Multiple regression |         |
|                                  |                     | Odds ratio                          |         | p value           |                     | Odds ratio          | p value |
| Age                              | 18-44               | 1.754                               |         | 0.0000            |                     | -                   | -       |
|                                  | 45+                 | 1.000                               |         | -                 |                     | -                   | -       |
| Age                              | Continuous variable | 0.981                               |         | 0.0000            |                     | 0.981               | 0.0000  |
| Number of persons in a household | Discrete variable   | 1.111                               |         | 0.0279            |                     | -                   | -       |
| Pickup at the post office        |                     |                                     |         |                   |                     |                     |         |
| Qualitative variables            |                     |                                     |         |                   |                     |                     |         |
| Variable                         | Class               | Number of respondents familiar with |         | Percent           |                     | p value             |         |
| Education                        | Primary             | 5 out of 10                         |         | 50.0              |                     | 0.0715              |         |
|                                  | Other               | 158 out of 673                      |         | 23.5              |                     |                     |         |
| Quantitative variables           |                     |                                     |         |                   |                     |                     |         |
| Variable                         | Pointed out         |                                     |         | Did not point out |                     |                     | p value |
|                                  | n                   | Mean                                | SD      | n                 | Mean                | SD                  |         |
| Age                              | 163                 | 43.9                                | 14.9    | 520               | 47.1                | 15.5                | 0.0181  |
| Logistic regression models       |                     |                                     |         |                   |                     |                     |         |
| Variable                         | Class               | Single-variable model               |         |                   | Multiple regression |                     |         |
|                                  |                     | Odds ratio                          | p value |                   | Odds ratio          | p value             |         |
| Education                        | Primary             | 3.259                               | 0.0644  |                   | -                   |                     | -       |
|                                  | Other               | 1.000                               | -       |                   | -                   |                     | -       |
| Age                              | Continuous variable | 0.986                               | 0.0208  |                   | 0.986               |                     | 0.0208  |

| Pickup from the seller—click and collect     |                     |                                     |         |                   |                     |                     |                |  |
|----------------------------------------------|---------------------|-------------------------------------|---------|-------------------|---------------------|---------------------|----------------|--|
| Qualitative variables                        |                     |                                     |         |                   |                     |                     |                |  |
| Variable                                     | Class               | Number of respondents familiar with |         | Percent           |                     | <i>p</i> value      |                |  |
| Age                                          | 18-24               | 20 out of 41                        |         | 48.8              |                     | 0.0207              |                |  |
|                                              | 25+                 | 140 out of 457                      |         | 30.6              |                     |                     |                |  |
| Quantitative variables                       |                     |                                     |         |                   |                     |                     |                |  |
| Variable                                     | Pointed out         |                                     |         | Did not point out |                     |                     | <i>p</i> value |  |
|                                              | n                   | Mean                                | SD      | n                 | Mean                | SD                  |                |  |
| Age                                          | 160                 | 42.2                                | 14.3    | 338               | 46.0                | 15.3                | 0.0080         |  |
| Number of persons in a household             | 160                 | 3.53                                | 1.39    | 338               | 3.28                | 1.38                | 0.0579         |  |
| Logistic regression models                   |                     |                                     |         |                   |                     |                     |                |  |
| Variable                                     | Class               | Single-variable model               |         |                   |                     | Multiple regression |                |  |
|                                              |                     | Odds ratio                          |         | p value           |                     | Odds ratio          | p value        |  |
| Age                                          | 18-24               | 2.156                               |         | 0.0193            |                     | -                   | -              |  |
|                                              | 25+                 | 1.000                               |         | -                 |                     | -                   | -              |  |
| Age                                          | Continuous variable | 0.983                               |         | 0.0244            |                     | 0.983               | 0.0244         |  |
| Number of persons in a household             | Discrete variable   | 1.139                               |         | 0.0584            |                     | -                   | -              |  |
| Pickup at a kiosk/shop or other pickup point |                     |                                     |         |                   |                     |                     |                |  |
| Qualitative variables                        |                     |                                     |         |                   |                     |                     |                |  |
| Variable                                     | Class               | Number of respondents using         |         | Percent           |                     | <i>p</i> value      |                |  |
| Population                                   | <1000               | 95 out of 283                       |         | 33.6              |                     | 0.0624              |                |  |
|                                              | >=1000              | 57 out of 220                       |         | 25.9              |                     |                     |                |  |
| Number of neighbors                          | <7                  | 9 out of 52                         |         | 17.3              |                     | 0.0250              |                |  |
|                                              | >=7                 | 146 out of 461                      |         | 31.7              |                     |                     |                |  |
| Quantitative variables                       |                     |                                     |         |                   |                     |                     |                |  |
| Variable                                     | Pointed out         |                                     |         | Did not point out |                     |                     | <i>p</i> value |  |
|                                              | N                   | Mean                                | SD      | n                 | Mean                | SD                  |                |  |
| Age                                          | 165                 | 42.9                                | 15.4    | 379               | 46.2                | 14.6                | 0.0175         |  |
| Logistic regression models                   |                     |                                     |         |                   |                     |                     |                |  |
| Variable                                     | Class               | Single-variable model               |         |                   | Multiple regression |                     |                |  |
|                                              |                     | Odds ratio                          | p value |                   | Odds ratio          |                     | <i>p</i> value |  |
| Population                                   | <1000               | 1.445                               | 0.0641  |                   | 1.591               |                     | 0.0257         |  |
|                                              | >=1000              | 1.000                               | -       |                   | 1.000               |                     | -              |  |

|                                                        |                     |                             |                       |                   |                     |                     |         |   |
|--------------------------------------------------------|---------------------|-----------------------------|-----------------------|-------------------|---------------------|---------------------|---------|---|
| Number of neighbors                                    | <7                  | 1.000                       | -                     | 1.000             | -                   |                     |         |   |
|                                                        | >=7                 | 2.214                       | 0.0365                | 2.158             | 0.0479              |                     |         |   |
| Age                                                    | Continuous variable | 0.985                       | 0.0158                | 0.986             | 0.0373              |                     |         |   |
| Free home delivery with the possibility of free return |                     |                             |                       |                   |                     |                     |         |   |
| Qualitative variables                                  |                     |                             |                       |                   |                     |                     |         |   |
| Variable                                               | Class               | Number of respondents       |                       | Percent           | P value             |                     |         |   |
| Age                                                    | 18-44               | 93 out of 261               |                       | 35.6              | 0.0009              |                     |         |   |
|                                                        | 45+                 | 67 out of 293               |                       | 22.9              |                     |                     |         |   |
| Quantitative variables                                 |                     |                             |                       |                   |                     |                     |         |   |
| Variable                                               | Pointed out         |                             |                       | Did not point out |                     | p value             |         |   |
|                                                        | N                   | Mean                        | SD                    | n                 | Mean                |                     | SD      |   |
| Age                                                    | 160                 | 41.9                        | 14.9                  | 394               | 47.8                | 15.5                | 0.0000  |   |
| Number of persons in a household                       | 160                 | 3.56                        | 1.58                  | 394               | 3.20                | 1.39                | 0.0123  |   |
| Logistic regression models                             |                     |                             |                       |                   |                     |                     |         |   |
| Variable                                               |                     | Class                       | Single-variable model |                   | Multiple regression |                     |         |   |
|                                                        |                     |                             | Odds ratio            | p value           | Odds ratio          | p value             |         |   |
| Age                                                    | 18-44               |                             | 1.867                 | 0.0010            | -                   | -                   |         |   |
|                                                        | 45+                 |                             | 1.000                 | -                 |                     |                     |         |   |
| Age                                                    | Continuous variable |                             | 0.975                 | 0.0001            | 0.975               | 0.0001              |         |   |
| Number of persons in a household                       | Discrete variable   |                             | 1.182                 | 0.0086            | -                   | -                   |         |   |
| The only option available                              |                     |                             |                       |                   |                     |                     |         |   |
| Courier delivery directly to home/work                 |                     |                             |                       |                   |                     |                     |         |   |
| Quantitative variables                                 |                     |                             |                       |                   |                     |                     |         |   |
| Variable                                               | Pointed out         |                             |                       | Did not point out |                     |                     | p value |   |
|                                                        | n                   | Mean                        | SD                    | n                 | Mean                | SD                  |         |   |
| Age                                                    | 143                 | 44.5                        | 15.0                  | 843               | 47.2                | 15.9                | 0.0540  |   |
| Logistic regression models                             |                     |                             |                       |                   |                     |                     |         |   |
| Variable                                               | Class               | Single-variable model       |                       |                   |                     | Multiple regression |         |   |
|                                                        |                     | Odds ratio                  |                       | p value           |                     | Odds ratio          | p value |   |
| Age                                                    | Continuous variable |                             | 0.989                 |                   | 0.0636              |                     | -       | - |
| Pickup at a kiosk/shop or other pickup point           |                     |                             |                       |                   |                     |                     |         |   |
| Qualitative variables                                  |                     |                             |                       |                   |                     |                     |         |   |
| Variable                                               | Class               | Number of respondents using |                       |                   | Percent             | p value             |         |   |
| Number of neighbors                                    | <100                | 119 out of 462              |                       |                   | 25.8                | 0.0983              |         |   |
|                                                        | >=100               | 8 out of 51                 |                       |                   | 15.7                |                     |         |   |
| Logistic regression models                             |                     |                             |                       |                   |                     |                     |         |   |
| Variable                                               | Class               | Single-variable model       |                       |                   | Multiple regression |                     |         |   |
|                                                        |                     | Odds ratio                  |                       | p value           | Odds ratio          |                     | p value |   |
| Number of neighbors                                    | <100                | -                           |                       | -                 | -                   |                     | -       |   |

|                                               |                     |                       |                |                     |                |                |                |
|-----------------------------------------------|---------------------|-----------------------|----------------|---------------------|----------------|----------------|----------------|
| >=100                                         |                     |                       |                |                     |                |                |                |
| <b>Faster</b>                                 |                     |                       |                |                     |                |                |                |
| <b>Courier delivery directly to home/work</b> |                     |                       |                |                     |                |                |                |
| Qualitative variables                         |                     |                       |                |                     |                |                |                |
| Variable                                      | Class               | Number of respondents |                | Percent             |                | <i>p</i> value |                |
| Age                                           | 18-64               | 236 out of 791        |                | 29.8                |                | 0.0030         |                |
|                                               | 65+                 | 38 out of 195         |                | 19.5                |                |                |                |
| Number of neighbors                           | <=7                 | 16 out of 91          |                | 17.6                |                | 0.0171         |                |
|                                               | >7                  | 241 out of 834        |                | 28.9                |                |                |                |
| Quantitative variables                        |                     |                       |                |                     |                |                |                |
| Variable                                      | Pointed out         |                       |                | Did not point out   |                |                | <i>p</i> value |
|                                               | n                   | Mean                  | SD             | n                   | Mean           | SD             |                |
| Age                                           | 274                 | 44.5                  | 15.2           | 712                 | 47.7           | 16.0           | 0.0039         |
| Number of persons in a household              | 274                 | 3.39                  | 1.42           | 712                 | 3.18           | 1.43           | 0.0429         |
| Logistic regression models                    |                     |                       |                |                     |                |                |                |
| Variable                                      | Class               | Single-variable model |                | Multiple regression |                |                |                |
|                                               |                     | Odds ratio            | <i>p</i> value | Odds ratio          | <i>p</i> value |                |                |
| Age                                           | 18-64               | 1.757                 | 0.0042         | 1.721               | 0.0237         |                |                |
|                                               | 65+                 | 1.000                 | -              | 1.000               | -              |                |                |
| Number of neighbors                           | <=7                 | 1.000                 | -              | 1.000               | -              |                |                |
|                                               | >7                  | 1.905                 | 0.0075         | 1.912               | 0.0237         |                |                |
| Age                                           | Continuous variable | 0.987                 | 0.0048         | -                   | -              |                |                |
| Number of persons in a household              | Discrete variable   | 1.104                 | 0.0439         | -                   | -              |                |                |
| <b>By post office directly to home/work</b>   |                     |                       |                |                     |                |                |                |
| Quantitative variables                        |                     |                       |                |                     |                |                |                |
| Variable                                      | Pointed out         |                       |                | Did not point out   |                |                | <i>p</i> value |
|                                               | n                   | Mean                  | SD             | n                   | Mean           | SD             |                |
| Age                                           | 118                 | 44.5                  | 15.5           | 641                 | 47.2           | 15.8           | 0.0833         |
| Logistic regression models                    |                     |                       |                |                     |                |                |                |
| Variable                                      | Class               | Single-variable model |                | Multiple regression |                |                |                |
|                                               |                     | Odds ratio            | <i>p</i> value | Odds ratio          | <i>p</i> value |                |                |
| Age                                           | Continuous variable | 0.989                 | 0.0873         | -                   | -              |                |                |
| <b>Pickup in a parcel locker</b>              |                     |                       |                |                     |                |                |                |
| Qualitative variables                         |                     |                       |                |                     |                |                |                |
| Variable                                      | Class               | Number of respondents |                | Percent             |                | <i>p</i> value |                |
| Age                                           | 18-34               | 42 out of 79          |                | 53.2                |                | 0.0023         |                |
|                                               | 35+                 | 293 out of 825        |                | 35.5                |                |                |                |
| Quantitative variables                        |                     |                       |                |                     |                |                |                |

| Variable                                 | Pointed out         |                            |                                   | Did not point out   |               |                | <i>p</i> value |
|------------------------------------------|---------------------|----------------------------|-----------------------------------|---------------------|---------------|----------------|----------------|
|                                          | n                   | Mean                       | SD                                | n                   | Mean          | SD             |                |
| Age                                      | 335                 | 43.4                       | 16.0                              | 569                 | 47.8          | 15.3           | 0.0001         |
| Logistic regression models               |                     |                            |                                   |                     |               |                |                |
| Variable                                 | Class               |                            | Single-<br>varia-<br>ble<br>model | Multiple regression |               |                |                |
|                                          |                     |                            | Odds<br>ratio                     | <i>p</i><br>value   | Odds ratio    | <i>p</i> value |                |
| Age                                      | 18-34               |                            | 1.887                             | 0.0000              | 1.887         | 0.0000         |                |
|                                          | 35+                 |                            | 1.000                             | -                   | 1.000         | -              |                |
| Age                                      | Continuous variable |                            | 0.982                             | 0.0001              | -             | -              |                |
| Pickup at the post office                |                     |                            |                                   |                     |               |                |                |
| Qualitative variables                    |                     |                            |                                   |                     |               |                |                |
| Variable                                 | Class               | Number of respond-<br>ents |                                   | Percent             |               | <i>p</i> value |                |
| Gender                                   | Female              | 46 out of 350              |                                   | 13.1                |               | 0.0627         |                |
|                                          | Male                | 29 out of 333              |                                   | 8.7                 |               |                |                |
| Quantitative variables                   |                     |                            |                                   |                     |               |                |                |
| Variable                                 | Pointed out         |                            |                                   | Did not point out   |               |                | <i>p</i> value |
|                                          | n                   | Mean                       | SD                                | n                   | Mean          | SD             |                |
| Age                                      | 75                  | 43.4                       | 16.1                              | 608                 | 46.7          | 15.3           | 0.0963         |
| Logistic regression models               |                     |                            |                                   |                     |               |                |                |
| Variable                                 | Class               | Single-variable model      |                                   | Multiple regression |               |                |                |
|                                          |                     | Odds ratio                 |                                   | <i>p</i> value      | Odds<br>ratio | <i>p</i> value |                |
| Gender                                   | Female              | 1.586                      |                                   | 0.0656              | -             | -              |                |
|                                          | Male                | 1.000                      |                                   | -                   | -             | -              |                |
| Age                                      | Continuous variable |                            | 0.986                             | 0.0817              | -             | -              |                |
| Pickup from the seller—click and collect |                     |                            |                                   |                     |               |                |                |
| Qualitative variables                    |                     |                            |                                   |                     |               |                |                |
| Variable                                 | Class               | Number of respond-<br>ents |                                   | Percent             |               | <i>p</i> value |                |
| Age                                      | 18-44               | 41 out of 255              |                                   | 16.1                |               | 0.0032         |                |
|                                          | 45-64               | 42 out of 169              |                                   | 24.9                |               |                |                |
|                                          | 65+                 | 6 out of 74                |                                   | 8.1                 |               |                |                |
| Logistic regression models               |                     |                            |                                   |                     |               |                |                |
| Variable                                 | Class               |                            | Single-<br>variable<br>model      | Multiple regression |               |                |                |
|                                          |                     |                            | Odds ra-<br>tio                   | <i>p</i><br>value   | Odds ratio    | <i>p</i> value |                |
| Age                                      | 18-44               |                            | 1.000                             | -                   | 1.000         | -              |                |
|                                          | 45-64               |                            | 1.984                             | 0.0039              | 1.984         | 0.0039         |                |
|                                          | 65+                 |                            | 1.000                             | -                   | 1.000         | -              |                |
| More reliable                            |                     |                            |                                   |                     |               |                |                |
| Courier delivery directly to home/work   |                     |                            |                                   |                     |               |                |                |
| Qualitative variables                    |                     |                            |                                   |                     |               |                |                |
| Variable                                 | Class               | Number of respond-<br>ents |                                   | Percent             |               | <i>p</i> value |                |

|                                      |                     |                                |                                         |                     |                     |                |                |
|--------------------------------------|---------------------|--------------------------------|-----------------------------------------|---------------------|---------------------|----------------|----------------|
| Age                                  | do 44<br>45+        | 96 out of 451<br>73 out of 535 | 21.3<br>13.6                            | 0.0015              |                     |                |                |
| Quantitative variables               |                     |                                |                                         |                     |                     |                |                |
| Variable                             | Pointed out         |                                |                                         | Did not point out   |                     |                | <i>p</i> value |
|                                      | n                   | Mean                           | SD                                      | n                   | Mean                | SD             |                |
| Age                                  | 169                 | 43.7                           | 15.9                                    | 817                 | 47.5                | 15.7           | 0.0050         |
| Logistic regression models           |                     |                                |                                         |                     |                     |                |                |
| Variable                             | Class               |                                | Single-<br>vari-<br>able<br>model       | Multiple regression |                     |                |                |
|                                      |                     |                                | Odds<br>ratio                           | <i>p</i> value      | Odds<br>ratio       | <i>p</i> value |                |
| Age                                  | do 44               |                                | 1.711                                   | 0.0016              | 1.711               | 0.0016         |                |
|                                      | 45+                 |                                | 1.000                                   | -                   | 1.000               | -              |                |
| Age                                  | Continuous variable |                                | 0.985                                   | 0.0046              | -                   | -              |                |
| By post office directly to home/work |                     |                                |                                         |                     |                     |                |                |
| Qualitative variables                |                     |                                |                                         |                     |                     |                |                |
| Variable                             | Class               |                                | Num-<br>ber of<br>re-<br>spond-<br>ents | Percent             | <i>p</i> value      |                |                |
|                                      |                     |                                |                                         |                     |                     |                |                |
| Gender                               | Female              |                                | 79 out<br>of 398                        | 19.9                | 0.0758              |                |                |
|                                      | Male                |                                | 54 out<br>of 361                        | 15.0                |                     |                |                |
| Age                                  | 55-64               |                                | 33 out<br>of 134                        | 24.6                | 0.0214              |                |                |
|                                      | Other               |                                | 100 out<br>of 625                       | 16.0                |                     |                |                |
| Logistic regression models           |                     |                                |                                         |                     |                     |                |                |
| Variable                             | Class               |                                | Single-variable model                   |                     | Multiple regression |                |                |
|                                      |                     |                                | Odds ratio                              | p value             | Odds<br>ratio       | p value        |                |
| Gender                               | Female              |                                | 1.408                                   | 0.0775              | -                   | -              |                |
|                                      | Male                |                                | 1.000                                   | -                   | -                   | -              |                |
| Age                                  | 55-64               |                                | 1.715                                   | 0.0181              | 1.715               | 0.0181         |                |
|                                      | Other               |                                | 1.000                                   | -                   | 1.000               | -              |                |
| Pickup in a parcel locker            |                     |                                |                                         |                     |                     |                |                |
| Qualitative variables                |                     |                                |                                         |                     |                     |                |                |
| Variable                             | Class               |                                | Num-<br>ber of<br>re-<br>spond-<br>ents | Per-<br>cent        | <i>p</i> value      |                |                |
|                                      |                     |                                |                                         |                     |                     |                |                |
| Age                                  | 18-64               |                                | 117 out<br>of 736                       | 15.9                | 0.0038              |                |                |
|                                      | 65+                 |                                | 13 out<br>of 168                        | 7.7                 |                     |                |                |
| Quantitative variables               |                     |                                |                                         |                     |                     |                |                |
| Variable                             | Pointed out         |                                |                                         | Did not point out   |                     |                | <i>p</i> value |

|                                          |                     | n                     | Mean  | SD                | n                   | Mean       | SD      |         |
|------------------------------------------|---------------------|-----------------------|-------|-------------------|---------------------|------------|---------|---------|
| Age                                      |                     | 130                   | 42.9  | 14.8              | 774                 | 46.7       | 15.8    | 0.0072  |
| Number of persons in a household         |                     | 130                   | 3.50  | 1.51              | 774                 | 3.22       | 1.40    | 0.0468  |
| Logistic regression models               |                     |                       |       |                   |                     |            |         |         |
| Variable                                 | Class               | Single-variable model |       |                   | Multiple regression |            |         |         |
|                                          |                     | Odds ratio            |       | p value           |                     | Odds ratio |         | p value |
| Age                                      | 18-64               | 2.254                 |       | 0.0079            |                     | 2.254      |         | 0.0079  |
|                                          | 65+                 | 1.000                 |       | -                 |                     | 1.000      |         | -       |
| Age                                      | Continuous variable | 0.984                 |       | 0.0101            |                     | -          |         | -       |
| Number of persons in a household         | Discrete variable   | 1.146                 |       | 0.0354            |                     | -          |         | -       |
| Pickup at the post office                |                     |                       |       |                   |                     |            |         |         |
| Qualitative variables                    |                     |                       |       |                   |                     |            |         |         |
| Variable                                 | Class               | Number of respondents |       | Percent           |                     | p value    |         |         |
| Gender                                   | Female              | 38 out of 350         |       | 10.9              |                     | 0.0236     |         |         |
|                                          | Male                | 56 out of 333         |       | 16.8              |                     |            |         |         |
| Quantitative variables                   |                     |                       |       |                   |                     |            |         |         |
| Variable                                 | Pointed out         |                       |       | Did not point out |                     |            | p value |         |
|                                          | n                   | Mean                  | SD    | n                 | Mean                | SD         |         |         |
| Number of persons in a household         | 94                  | 3.53                  | 1.45  | 589               | 3.22                | 1.40       | 0.0531  |         |
| Logistic regression models               |                     |                       |       |                   |                     |            |         |         |
| Variable                                 | Class               | Single-variable model |       |                   | Multiple regression |            |         |         |
|                                          |                     | Odds ratio            |       | p value           |                     | Odds ratio |         | p value |
| Gender                                   | Female              | 1.000                 |       |                   |                     | -          | 1.000   |         |
|                                          | Male                | 1.660                 |       |                   |                     | 0.0248     | 1.664   |         |
| Number of persons in a household         | Discrete variable   |                       | 1.163 |                   | 0.0462              |            | 1.163   |         |
|                                          |                     |                       |       |                   |                     |            | 0.0457  |         |
| Pickup from the seller—click and collect |                     |                       |       |                   |                     |            |         |         |
| Quantitative variables                   |                     |                       |       |                   |                     |            |         |         |
| Variable                                 | Pointed out         |                       |       | Did not point out |                     |            | p value |         |
|                                          | n                   | Mean                  | SD    | n                 | Mean                | SD         |         |         |

|                                                        |                     |                       |         |                   |                     |            |         |
|--------------------------------------------------------|---------------------|-----------------------|---------|-------------------|---------------------|------------|---------|
| Age                                                    | 85                  | 42.3                  | 15.0    | 413               | 45.3                | 15.0       | 0.0920  |
| Logistic regression models                             |                     |                       |         |                   |                     |            |         |
| Variable                                               | Class               | Single-variable model |         |                   | Multiple regression |            |         |
|                                                        |                     | Odds ratio            | p value | Odds ratio        | p value             |            |         |
| Age                                                    | Continuous variable |                       | 0.986   | 0.0916            | -                   |            | -       |
| Pickup at a kiosk/shop or other pickup point           |                     |                       |         |                   |                     |            |         |
| Qualitative variables                                  |                     |                       |         |                   |                     |            |         |
| Variable                                               | Class               | Number of respondents |         |                   | Percent             | p value    |         |
| Age                                                    | 18-64               | 61 out of 462         |         |                   | 13.2                | 0.0053     |         |
|                                                        | 65+                 | 3 out of 82           |         |                   | 3.7                 |            |         |
| Quantitative variables                                 |                     |                       |         |                   |                     |            |         |
| Variable                                               | Pointed out         |                       |         | Did not point out |                     |            | p value |
|                                                        | n                   | Mean                  | SD      | n                 | Mean                | SD         |         |
| Age                                                    | 64                  | 41.6                  | 13.1    | 480               | 45.7                | 15.1       | 0.0258  |
| Number of persons in a household                       | 64                  | 3.61                  | 1.42    | 480               | 3.28                | 1.37       | 0.0872  |
| Logistic regression models                             |                     |                       |         |                   |                     |            |         |
| Variable                                               | Class               | Single-variable model |         |                   | Multiple regression |            |         |
|                                                        |                     | Odds ratio            |         |                   | p value             | Odds ratio | p value |
| Age                                                    | 18-64               | 4.006                 |         |                   | 0.0216              | 4.006      | 0.0216  |
|                                                        | 65+                 | 1.000                 |         |                   | -                   | 1.000      | -       |
| Age                                                    | Continuous variable |                       | 0.981   | 0.0432            | -                   |            | -       |
| Number of persons in a household                       | Discrete variable   |                       | 1.179   | 0.0761            | -                   |            | -       |
| Free home delivery with the possibility of free return |                     |                       |         |                   |                     |            |         |
| Qualitative variables                                  |                     |                       |         |                   |                     |            |         |
| Variable                                               | Class               | Number of respondents |         | Percent           | p value             |            |         |
| Age                                                    | 18-44               | 39 out of 148         |         | 26.4              | 0.0134              |            |         |
|                                                        | 45+                 | 68 out of 406         |         | 16.8              |                     |            |         |
| Quantitative variables                                 |                     |                       |         |                   |                     |            |         |
| Variable                                               | Pointed out         |                       |         | Did not point out |                     |            | p value |
|                                                        | n                   | Mean                  | SD      | n                 | Mean                | SD         |         |
| Age                                                    | 107                 | 43.5                  | 15.4    | 447               | 46.7                | 15.5       | 0.0589  |
| Logistic regression models                             |                     |                       |         |                   |                     |            |         |
| Variable                                               | Class               | Single-variable model |         |                   | Multiple regression |            |         |
|                                                        |                     | Odds ratio            | p value | Odds ratio        | p value             |            |         |
| Age                                                    | 18-44               | 1.778                 |         | 0.0120            | 1.778               |            | 0.0120  |

|                                          |                              |                             |         |                     |         |
|------------------------------------------|------------------------------|-----------------------------|---------|---------------------|---------|
|                                          | 45+                          | 1.000                       | -       | 1.000               | -       |
| Age                                      | Continuous variable          | 0.987                       | 0.0596  | -                   | -       |
| More comfortable                         |                              |                             |         |                     |         |
| Courier delivery directly to home/work   |                              |                             |         |                     |         |
| Qualitative variables                    |                              |                             |         |                     |         |
| Variable                                 | Class                        | Number of respondents       | Percent | p value             |         |
| Age                                      | 35-54                        | 153 out of 370              | 41.4    | 0.0000              |         |
|                                          | Other                        | 355 out of 616              | 57.6    |                     |         |
| Education                                | At most upper primary school | 12 out of 38                | 31.6    | 0.0113              |         |
|                                          | Secondary or higher          | 496 out of 948              | 52.3    |                     |         |
| Logistic regression models               |                              |                             |         |                     |         |
| Variable                                 | Class                        | Single-variable model       |         | Multiple regression |         |
|                                          |                              | Odds ratio                  | p value | Odds ratio          | p value |
| Age                                      | 35-54                        | 1.000                       | -       | 1.000               | -       |
|                                          | Other                        | 1.929                       | 0.0000  | 1.912               | 0.0000  |
| Education                                | At most upper primary school | 1.000                       | -       | 1.000               | -       |
|                                          | Secondary or higher          | 2.378                       | 0.0146  | 2.271               | 0.0223  |
| Pickup in a parcel locker                |                              |                             |         |                     |         |
| Qualitative variables                    |                              |                             |         |                     |         |
| Variable                                 | Class                        | Number of respondents using | Percent | p value             |         |
| Gender                                   | Female                       | 168 out of 455              | 36.9    | 0.0729              |         |
|                                          | Male                         | 192 out of 449              | 42.8    |                     |         |
| Number of neighbors                      | <7                           | 18 out of 79                | 22.8    | 0.0007              |         |
|                                          | At least 7                   | 321 out of 769              | 41.7    |                     |         |
| Logistic regression models               |                              |                             |         |                     |         |
| Variable                                 | Class                        | Single-variable model       |         | Multiple regression |         |
|                                          |                              | Odds ratio                  | p value | Odds ratio          | p value |
| Gender                                   | Female                       | 1.000                       | -       | -                   | -       |
|                                          | Male                         | 1.276                       | 0.0732  | -                   | -       |
| Number of neighbors                      | <7                           | 1.000                       | -       | 1.000               | -       |
|                                          | At least 7                   | 2.428                       | 0.0014  | 2.428               | 0.0014  |
| Pickup from the seller—click and collect |                              |                             |         |                     |         |
| Qualitative variables                    |                              |                             |         |                     |         |
| Variable                                 | Class                        | Number of respondents       | Percent | p value             |         |
| Population                               | <2000                        | 52 out of 338               | 15.4    | 0.0185              |         |
|                                          | Other                        | 9 out of 122                | 7.4     |                     |         |
| Logistic regression models               |                              |                             |         |                     |         |
| Variable                                 | Class                        | Single-variable model       |         | Multiple regression |         |
|                                          |                              | Odds ratio                  | p value | Odds ratio          | p value |

|                                                        |         |                                        |                |                     |                |        |
|--------------------------------------------------------|---------|----------------------------------------|----------------|---------------------|----------------|--------|
| Popula-<br>tion                                        |         | <2000                                  | 2.283          | 0.0289              | 2.283          | 0.0289 |
|                                                        |         | Other                                  | 1.000          | -                   | 1.000          | -      |
| Free home delivery with the possibility of free return |         |                                        |                |                     |                |        |
| Qualitative variables                                  |         |                                        |                |                     |                |        |
| Varia-<br>ble                                          | Class   | Number of respondents<br>familiar with | Percent        |                     | <i>p</i> value |        |
| Educa-<br>tion                                         | Primary | 6 out of 7                             | 85.7           |                     | 0.0302         |        |
|                                                        | Other   | 253 out of 547                         | 46.3           |                     |                |        |
| Logistic regression models                             |         |                                        |                |                     |                |        |
| Varia-<br>ble                                          | Class   | Single-variable model                  |                | Multiple regression |                |        |
|                                                        |         | Odds<br>ratio                          | <i>p</i> value | Odds ratio          | <i>p</i> value |        |
| Educa-<br>tion                                         | Primary | 6.972                                  | 0.0731         | -                   | -              |        |
|                                                        | Other   | 1.000                                  | -              |                     |                |        |

**Table S4.** Means of transport used to pick up the delivery during out-of-home delivery—factors differentiating the answers provided by rural e-customers (own elaboration).

| On Foot                          |                              |                       |         |                     |                   |         |      |         |
|----------------------------------|------------------------------|-----------------------|---------|---------------------|-------------------|---------|------|---------|
| Qualitative variables            |                              |                       |         |                     |                   |         |      |         |
| Variable                         | Class                        | n                     | Percent | p value             |                   |         |      |         |
| Population                       | <2000                        | 85 out of 710         | 12.0    | 0.0000              |                   |         |      |         |
|                                  | more                         | 80 out of 262         | 30.5    |                     |                   |         |      |         |
| Number of neighbors              | <100                         | 131 out of 885        | 14.8    | 0.0000              |                   |         |      |         |
|                                  | >=100                        | 37 out of 111         | 33.3    |                     |                   |         |      |         |
| Logistic regression models       |                              |                       |         |                     |                   |         |      |         |
| Variable                         | Class                        | Single-variable model |         | Multiple regression |                   |         |      |         |
|                                  |                              | Odds ratio            | p value | Odds ratio          | p value           |         |      |         |
| Population                       | >2000                        | 3.232                 | 0.0000  | 3.081               | 0.0000            |         |      |         |
|                                  | more                         | 1.000                 | -       | 1.000               | -                 |         |      |         |
| Number of neighbors              | <100                         | 1.000                 | -       | 1.000               | -                 |         |      |         |
|                                  | >=100                        | 2.878                 | 0.0000  | 2.150               | 0.0000            |         |      |         |
| By private car                   |                              |                       |         |                     |                   |         |      |         |
| Qualitative variables            |                              |                       |         |                     |                   |         |      |         |
| Variable                         | Class                        | n                     | Percent | p value             |                   |         |      |         |
| Education                        | At most upper primary school | 25 out of 45          | 55.6    | 0.0005              |                   |         |      |         |
|                                  | Secondary or higher          | 814 out of 1026       | 79.3    |                     |                   |         |      |         |
| Population                       | <3000                        | 661 out of 805        | 82.1    | 0.0000              |                   |         |      |         |
|                                  | More                         | 107 out of 167        | 64.1    |                     |                   |         |      |         |
| Number of neighbors              | <100                         | 724 out of 885        | 81.8    | 0.0000              |                   |         |      |         |
|                                  | >=100                        | 69 out of 111         | 62.2    |                     |                   |         |      |         |
| Quantitative variables           |                              |                       |         |                     |                   |         |      |         |
| Variable                         |                              | Pointed out           |         |                     | Did not point out |         |      | p value |
|                                  |                              | n                     | Mean    | SD                  | n                 | Mean    | SD   |         |
| Number of persons in a household |                              | 839                   | 3.34    | 1.41                | 232               | 2.92    | 1.50 | 0.0002  |
| Logistic regression models       |                              |                       |         |                     |                   |         |      |         |
| Variable                         | Class                        | Single-variable model |         | Multiple regression |                   | p value |      |         |
|                                  |                              | Odds ratio            | p value | Odds ratio          | p value           |         |      |         |
| Education                        | At most upper primary school | 1.000                 | -       | 1.000               | -                 | 0.0019  |      |         |
|                                  |                              | 3.072                 | 0.0003  | 3.469               |                   |         |      |         |

| Secondary or higher              |                              |                       |              |                     |         |        |         |
|----------------------------------|------------------------------|-----------------------|--------------|---------------------|---------|--------|---------|
| Population                       |                              | <3000                 | 2.574        | 0.0000              | 2.542   | 0.0000 |         |
|                                  |                              | >= 3000               | 1.000        | -                   | 1.000   | -      |         |
| Number of neighbors              |                              | <100                  | 2.737        | 0.0000              | 2.075   | 0.0018 |         |
|                                  |                              | >=100                 | 1.000        | -                   | 1.000   | -      |         |
| Number of persons in a household |                              | Discrete variable     | 1.237        | 0.0001              | 1.214   | 0.0020 |         |
| By bike                          |                              |                       |              |                     |         |        |         |
| Qualitative variables            |                              |                       |              |                     |         |        |         |
| Variable                         | Class                        | n                     | Percent      |                     | p value |        |         |
| Gender                           | Female                       | 52 out of 543         | 9.6          |                     | 0.0031  |        |         |
|                                  | Male                         | 82 out of 528         | 15.5         |                     |         |        |         |
| Population                       | <3000                        | 82 out of 805         | 10.2         |                     | 0.0000  |        |         |
|                                  | >=3000                       | 41 out of 167         | 24.6         |                     |         |        |         |
| Logistic regression models       |                              |                       |              |                     |         |        |         |
| Variable                         | Class                        | Single-variable model |              | Multiple regression |         |        |         |
|                                  |                              | Odds ratio            | p value      | Odds ratio          | p value |        |         |
| Gender                           | Female                       | 1.000                 | -            | 1.000               | -       |        |         |
|                                  | Male                         | 1.736                 | 0.0035       | 1.649               | 0.0126  |        |         |
| Population                       | <3000                        | 1.000                 | -            | 1.000               | -       |        |         |
|                                  | >=3000                       | 2.869                 | 0.0000       | 2.866               | 0.0000  |        |         |
| By public transport              |                              |                       |              |                     |         |        |         |
| Qualitative variables            |                              |                       |              |                     |         |        |         |
| Variable                         | Class                        | n                     | Per-<br>cent |                     | p value |        |         |
| Age                              | 18–24                        | 83 out of 98          | 15.3         |                     | 0.0080  |        |         |
|                                  | 25+                          | 68 out of 973         | 7.0          |                     |         |        |         |
| Education                        | At most upper primary school | 8 out of 45           | 17.8         |                     | 0.0246  |        |         |
|                                  | Secondary or higher          | 75 out of 1026        | 7.3          |                     |         |        |         |
| Quantitative variables           |                              |                       |              |                     |         |        |         |
| Variable                         | Pointed out                  |                       |              | Did not point out   |         |        | p value |
|                                  | n                            | Mean                  | SD           | n                   | Mean    | SD     |         |
| Age                              | 83                           | 41.6                  | 16.7         | 988                 | 46.6    | 15.8   | 0.0107  |
| Logistic regression models       |                              |                       |              |                     |         |        |         |
| Variable                         | Class                        | Single-variable model |              | Multiple regression |         |        |         |
|                                  |                              | Odds ratio            | p value      | Odds ratio          | p value |        |         |
| Age                              | 18–24                        | 2.405                 | 0.0043       | -                   | -       |        |         |
|                                  | 25+                          | 1.000                 | -            |                     |         |        |         |
| Education                        | At most upper primary school | 2.742                 | 0.0134       | 2.512               | 0.0252  |        |         |
|                                  | Secondary or higher          | 1.000                 | -            | 1.000               | -       |        |         |
| Age                              | Continuous variable          | 0.980                 | 0.0070       | 0.981               | 0.0107  |        |         |
